# Supplementary material
Source: MDPI journal article supplement (https://www.mdpi.com/search?q=biosensors-11-00057)
Supplement: s001 [file biosensors-11-00057-s001.pdf]

# Electrical Characterization of Nitrocellulose Membranes towards Bacterial Detection in Water <sup>†</sup>

Grégoire Le Brun<sup>1,\*</sup>, Margo Hauwaert <sup>1</sup>, Audrey Leprince <sup>2</sup>, Karine Glinel <sup>3</sup>, Jacques Mahillon <sup>2</sup> and Jean-Pierre Raskin <sup>1</sup>

<sup>1</sup> Institute of Information and Communication Technologies, Electronics and Applied Mathematics, UCLouvain, 1348 Louvain-la-Neuve, Belgium; margo.hauwaert@student.uclouvain.be (M.H.); jean.pierre.raskin@uclouvain.be (J.-P.R.)

<sup>2</sup> Laboratory of Food and Environmental Microbiology, Earth and Life Institute, UCLouvain, 1348 Louvain-la-Neuve, Belgium; audrey.leprin@uclouvain.be (A.L.); j.mahillon@uclouvain.be (J.M.)

<sup>3</sup> Institute of Condensed Matter and Nanosciences (Bio and Soft Matter), UCLouvain, 1348 Louvain-La-Neuve, Belgium; k.glinel@uclouvain.be

\* Correspondence: gregoire.lebrun@uclouvain.be

**Table S1.** Results from the fitting of impedance data (Figure 5) to the simple electrical equivalent model used for the parallel-plate setup. All fit were accurate ( $R^2 < 0.2$ ). Mean ( $\mu$ )  $\pm$  standard deviation (s. d.) on twelve measurements from two independent experiments.

| Saline solution $c_{NaCl}$ [mol/L]     | $R_{NC}$ [ $\Omega$ ]                   | $C_{NC}$ [pF]                           | $C_{baking}$ [pF] |
|----------------------------------------|-----------------------------------------|-----------------------------------------|-------------------|
|                                        | Mean ( $\mu$ ) $\pm$ s. d. ( $\sigma$ ) | Mean ( $\mu$ ) $\pm$ s. d. ( $\sigma$ ) |                   |
| <b><math>10^{-5}</math> M</b>          | 202 923 $\pm$ 4855                      | 9.028 $\pm$ 0.071                       | 100               |
| <b><math>10^{-4}</math> M</b>          | 191 393 $\pm$ 2426                      | 8.336 $\pm$ 0.024                       | 100               |
| <b><math>5 \times 10^{-4}</math> M</b> | 164 160 $\pm$ 7400                      | 8.819 $\pm$ 0.123                       | 100               |
| <b><math>10^{-3}</math> M</b>          | 105 279 $\pm$ 3813                      | 10.32 $\pm$ 0.13                        | 100               |
| <b><math>5 \times 10^{-3}</math> M</b> | 55 512 $\pm$ 322                        | 11.85 $\pm$ 0.051                       | 100               |
| <b><math>10^{-2}</math> M</b>          | 23 422 $\pm$ 2096                       | 16.08 $\pm$ 0.397                       | 100               |
| <b><math>10^{-1}</math> M</b>          | 2165 $\pm$ 76                           | 19.75 $\pm$ 0.431                       | 100               |

**Table S2.** Results from the fitting of impedance data (Figure 6) to the simple electrical equivalent model used for the parallel-plate setup. All fit were accurate ( $R^2 < 0.2$ ). Mean ( $\mu$ )  $\pm$  standard deviation (s. d.) on twelve measurements from two independent experiments.

| Biological solution                                     | $R_{NC}$ [ $\Omega$ ]                   | $C_{NC}$ [pF]                           | $C_{baking}$ [pF] |
|---------------------------------------------------------|-----------------------------------------|-----------------------------------------|-------------------|
|                                                         | Mean ( $\mu$ ) $\pm$ s. d. ( $\sigma$ ) | Mean ( $\mu$ ) $\pm$ s. d. ( $\sigma$ ) |                   |
| <b>PBS:1000</b>                                         | 156 313 $\pm$ 1580                      | 8.223 $\pm$ 0.025                       | 100               |
| <b><i>B. thuringiensis</i> <math>10^8</math> CFU/mL</b> | 118 317 $\pm$ 2426                      | 9.312 $\pm$ 0.018                       | 100               |
